# Supplementary material for: Deep RNA-seq of male and female murine sensory neuron subtypes after nerve injury
Source: PubMed Central journal article supplement (PMC10502896; doi:10.1097/j.pain.0000000000002934), 2023-06-06

# Supplemental Figure 1

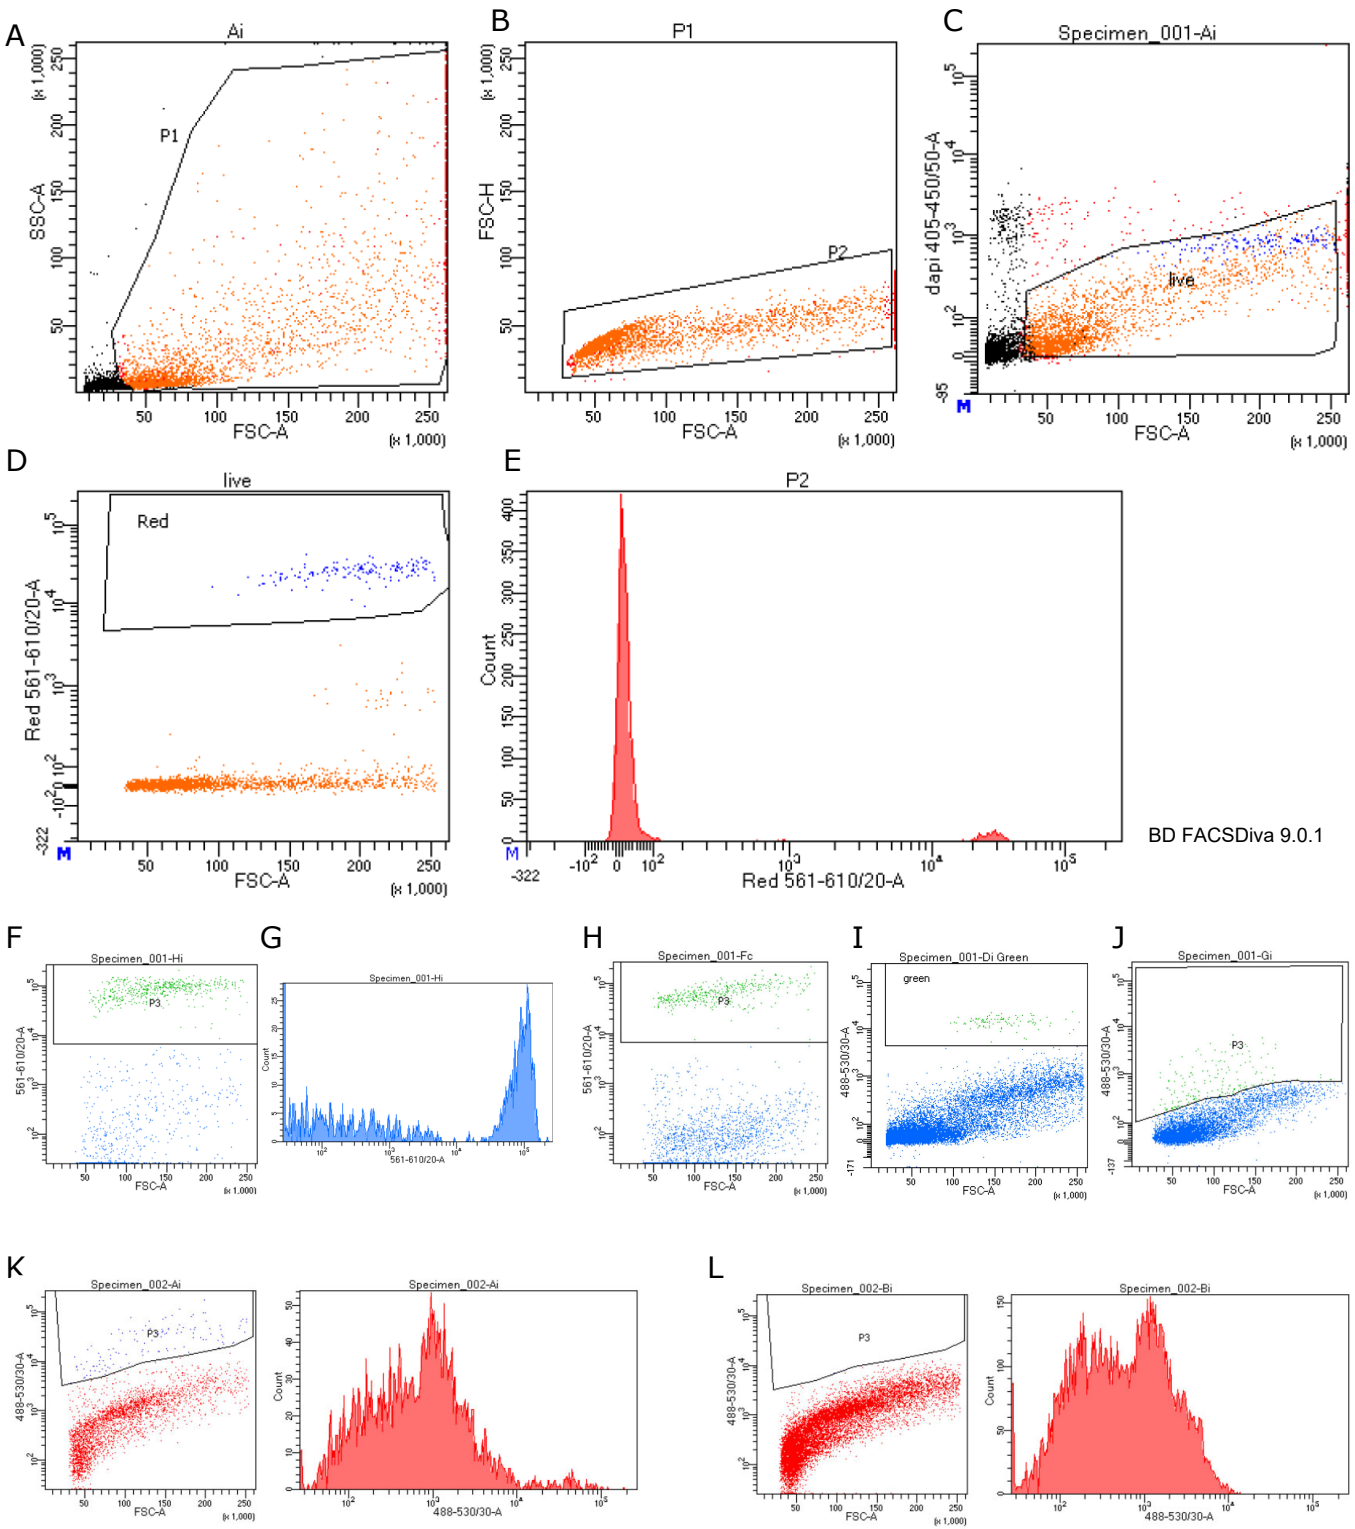

# Supplemental Figure 2

A

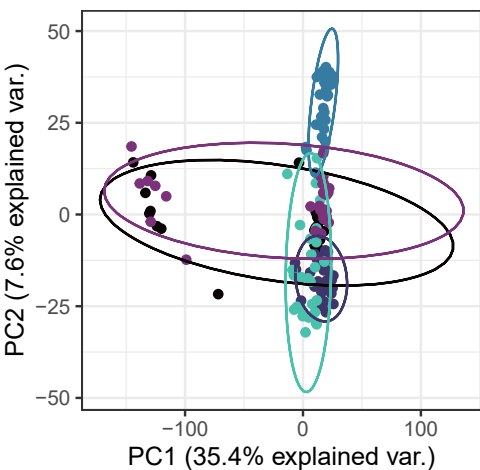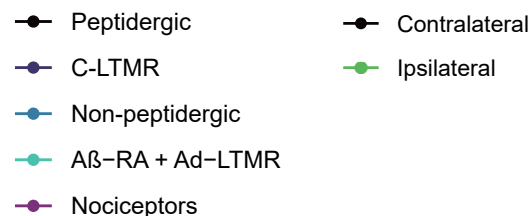

B

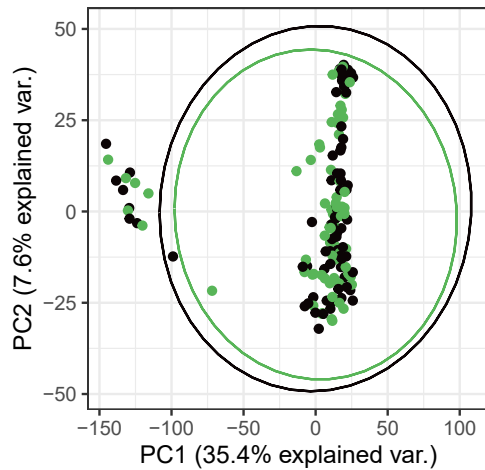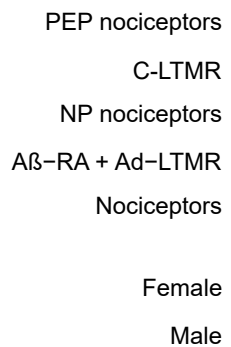

C

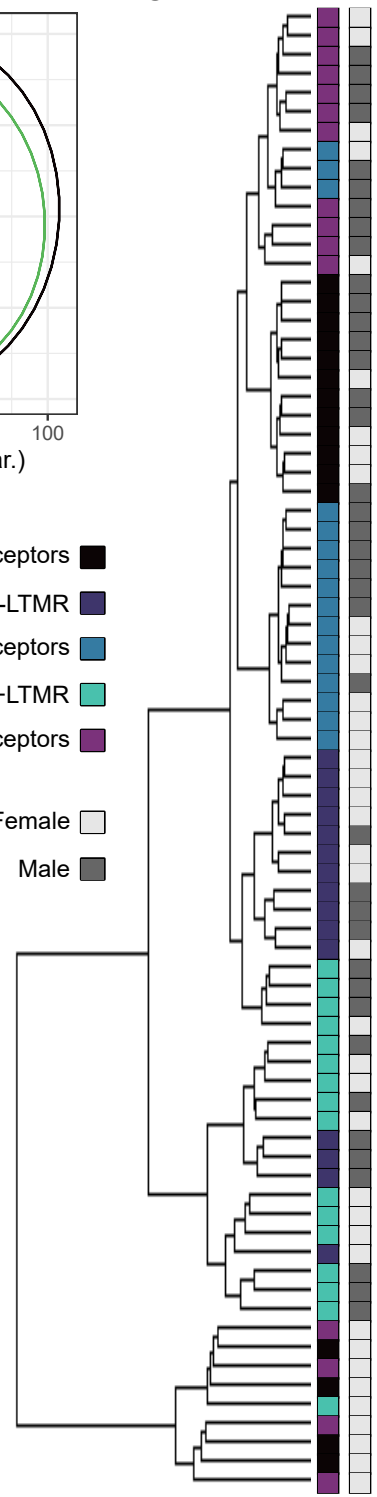

D.

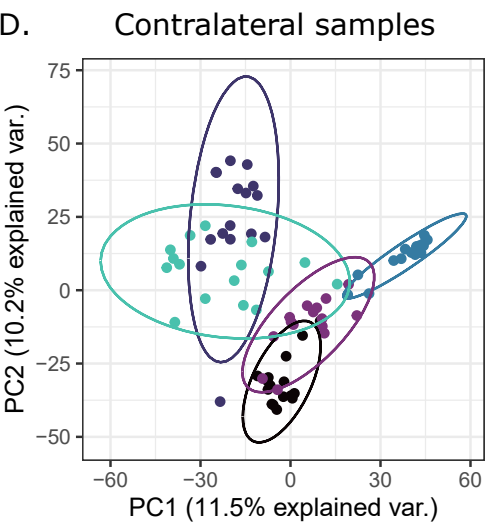

### Supplemental Figure 3

A Nav1.8 enrichment or depletion (DTA/control) in male mice

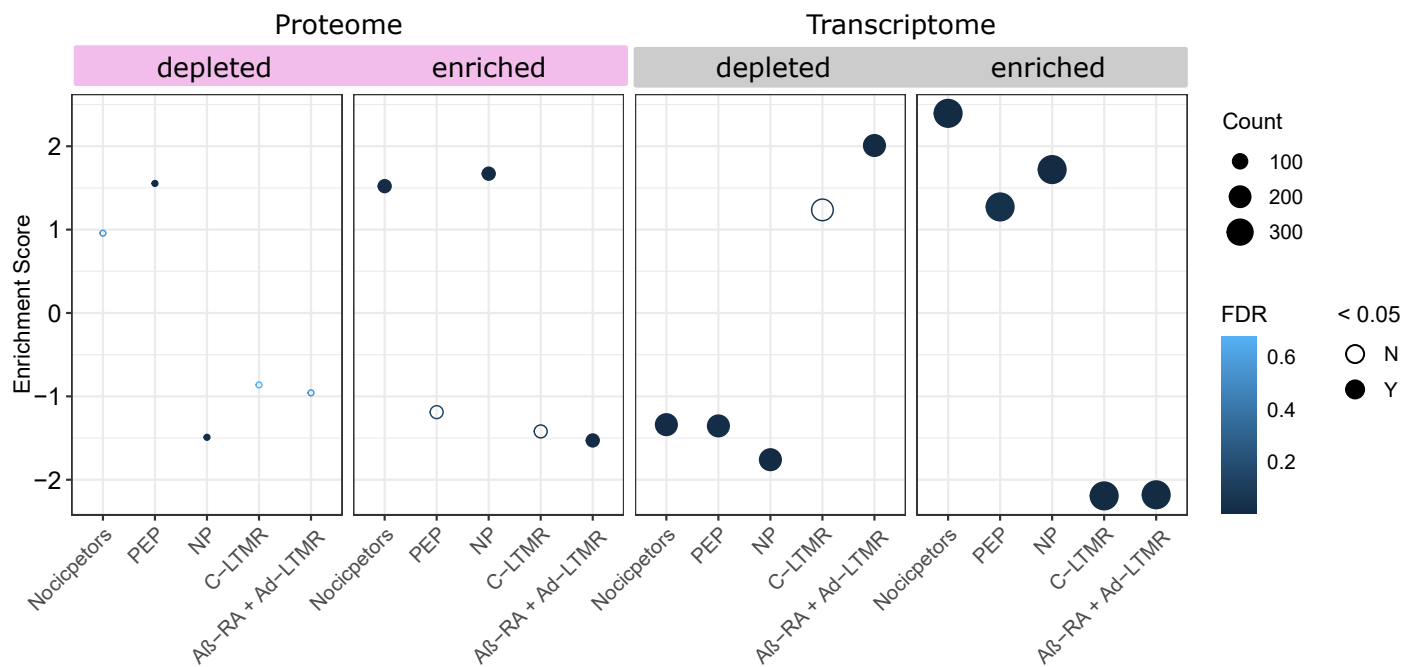

B

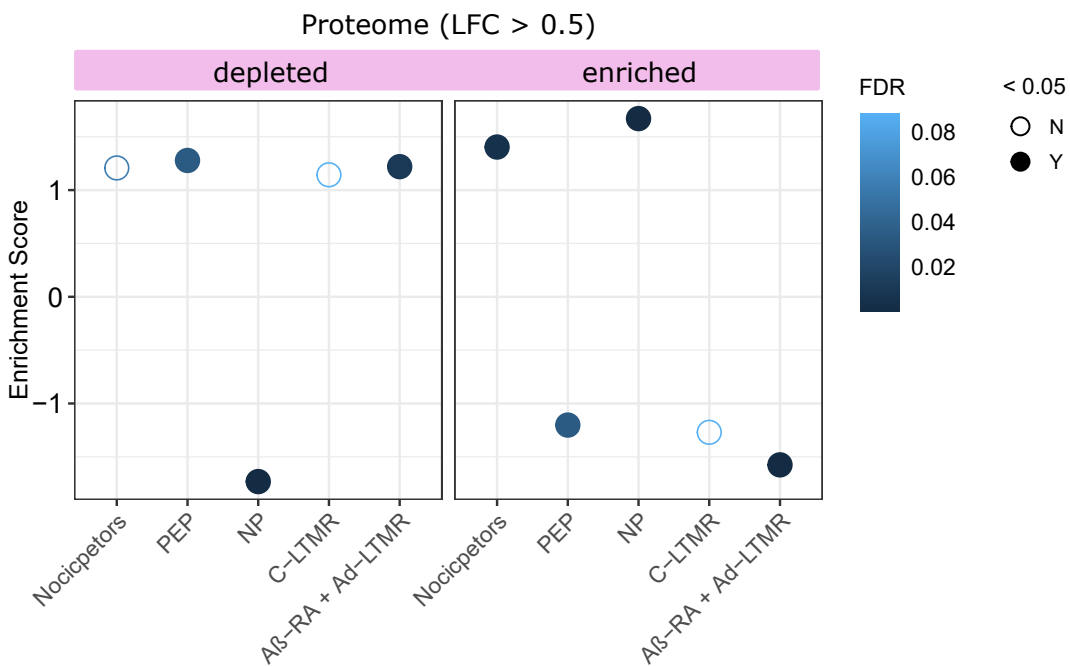

Supplement: jop-164-2196-s001.pdf [file jop-164-2196-s001.pdf]
